# Supplementary material for: Suppressing phase coarsening in immiscible polymer blends using nano-silica particles located at the interface
Source: Royal Society of Chemistry journal article supplement (doi:10.1039/c5ra13637g), 2015-01-01
Supplement: c5ra13637g1.pdf [file c5ra13637g1.pdf]

### Supplementary information

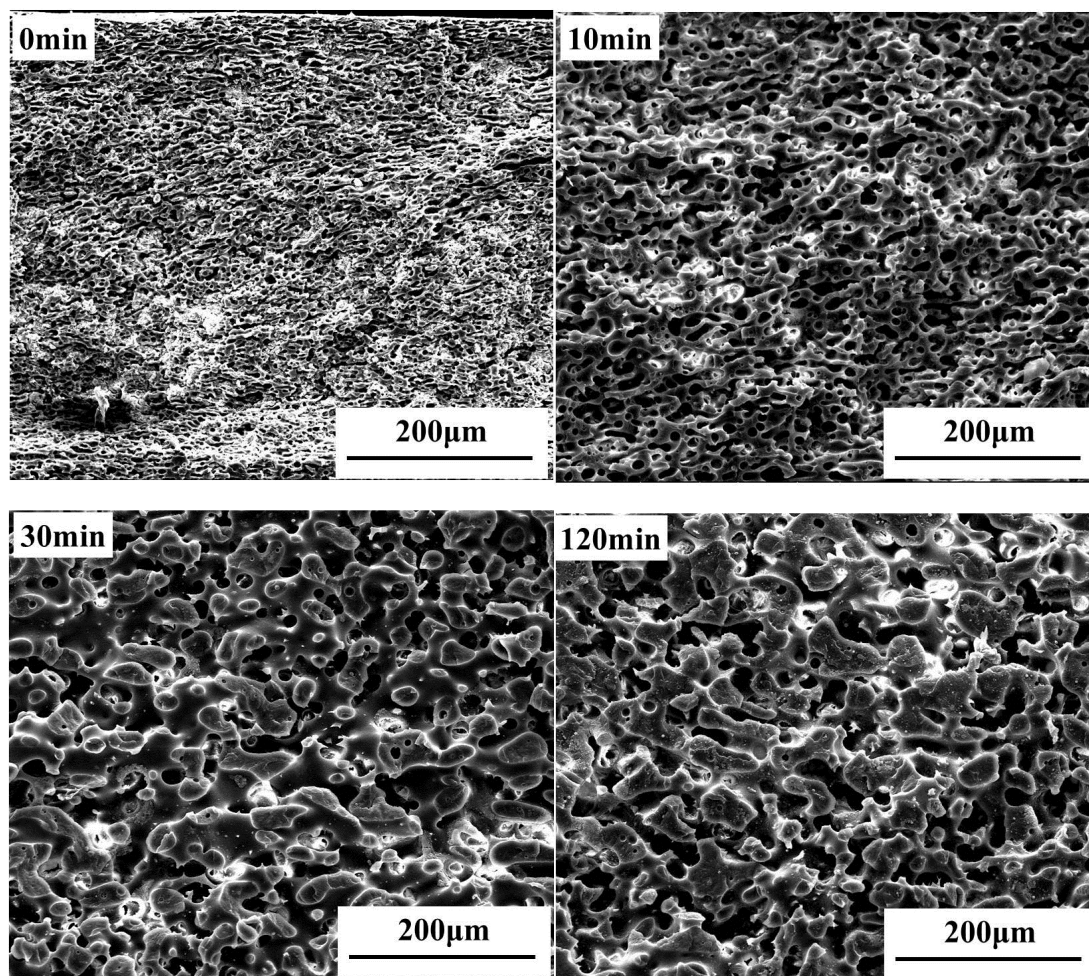

Fig. S1 SEM micrographs of 4wt% R974 nano- SiO<sub>2</sub> particle filled 50/50 PP/PS blend after annealing at 190 °C for various time.

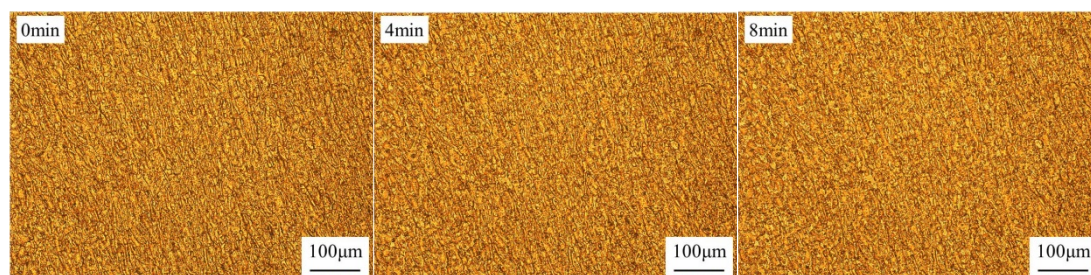

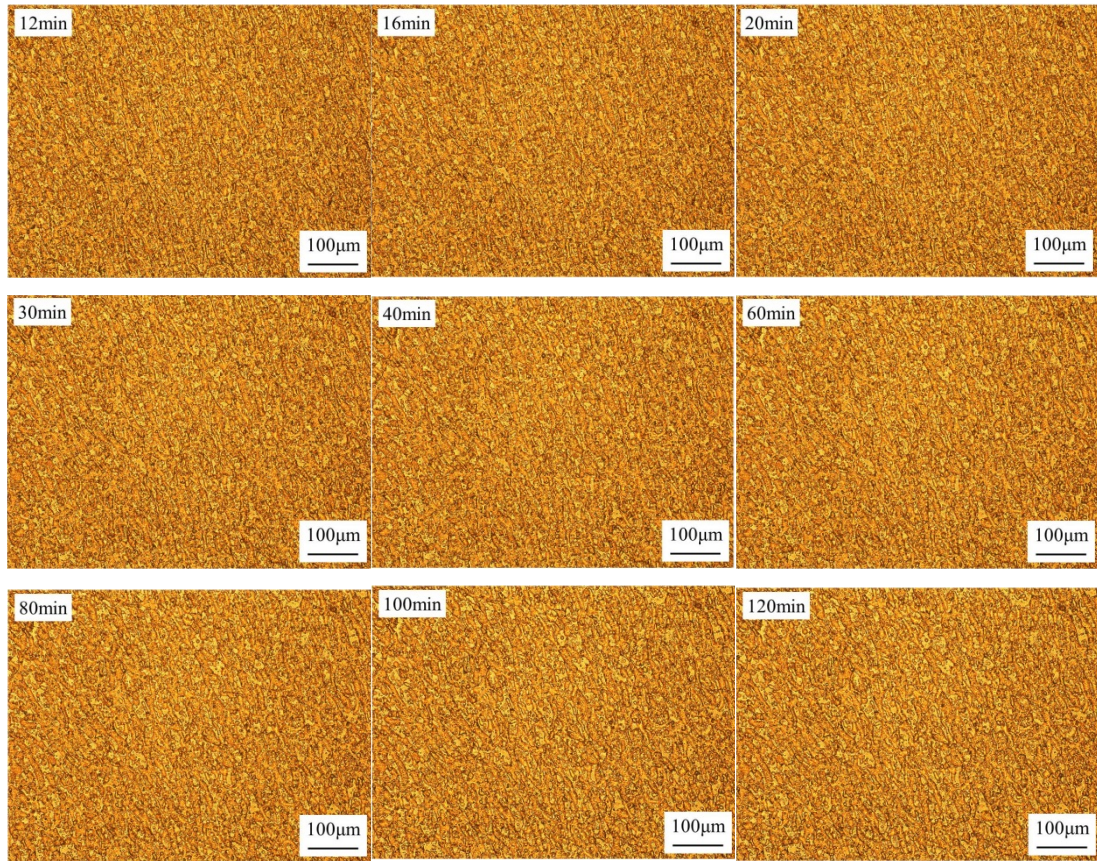

Fig. S2 Morphology evolution of 4wt% nano- SiO<sub>2</sub> particle filled 50/50 PP/PS blend observed by an optical microscope during annealing at 190 °C.
